# Supplementary material for: Pyroptosis Patterns Are Involved in Immune Microenvironment Regulation of Dilated Cardiomyopathy
Source: Hindawi journal article supplement (doi:10.1155/2022/4627845), 2022-03-10

**A**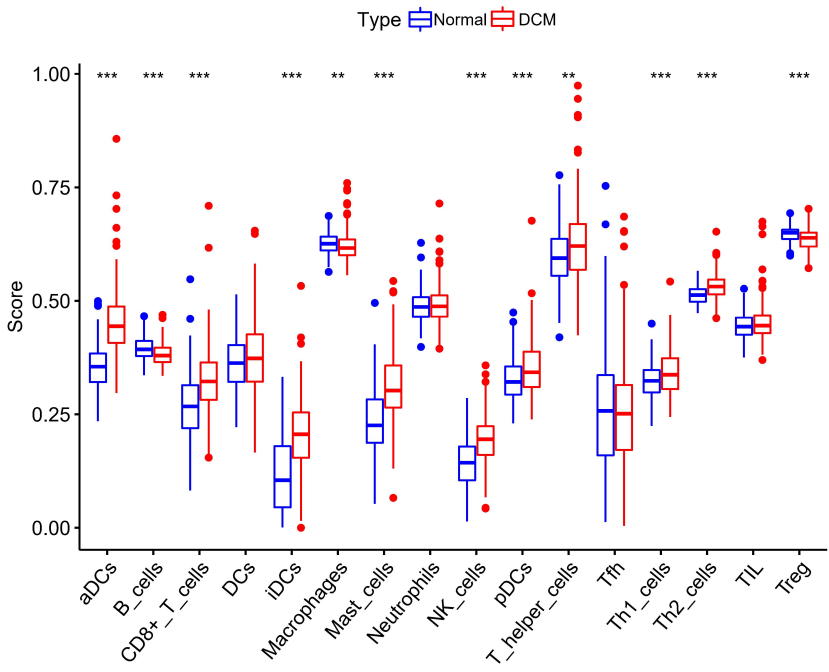**B**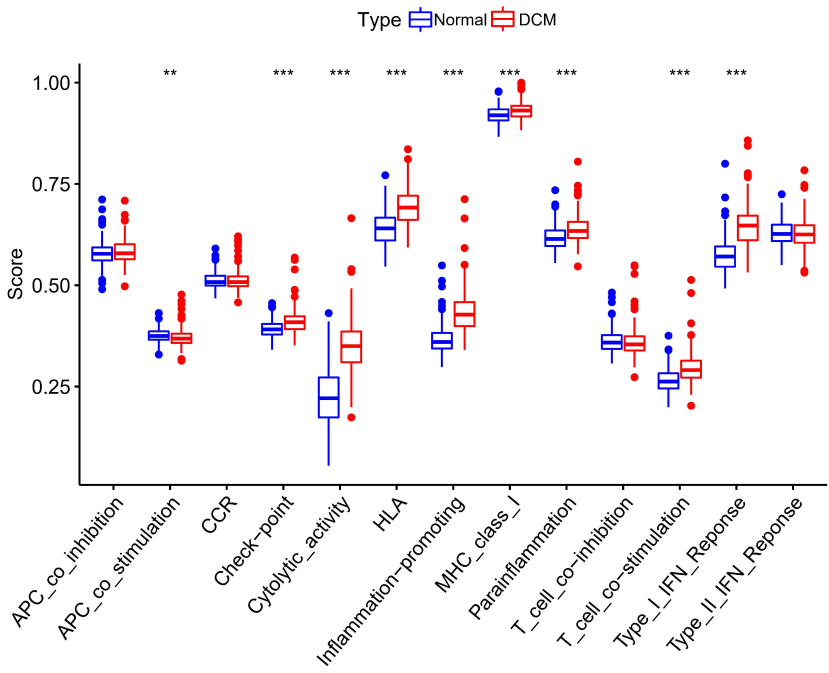

Supplement: f1 [file 4627845.f1.pdf]
